# Supplementary material
Source: PubMed Central journal article supplement (PMC8564579)
Supplement: jama-e2117843-s004.pdf [file jama-e2117843-s004.pdf]

\*Indicates required information. Only first name, last name, and suffix will appear in PubMed.

| <b>*Group Name(s): Trial Steering Committee (TSC), Independent Data Monitoring Committee (IDMC), Independent Endpoint Review Committee (ERC), Trial Management Group (TMG), Investigators</b> |                   |                              |                  |                                                                           |                                          |                                                         |                                                                                            |
|-----------------------------------------------------------------------------------------------------------------------------------------------------------------------------------------------|-------------------|------------------------------|------------------|---------------------------------------------------------------------------|------------------------------------------|---------------------------------------------------------|--------------------------------------------------------------------------------------------|
| <b>*First Name and Middle Initial(s)</b>                                                                                                                                                      | <b>*Last Name</b> | <b>*Suffix (eg, Jr, III)</b> | Academic Degrees | Institution                                                               | Location (city, state/province, country) | Role or Contribution, eg, chair, principal investigator | Group (if more than 1 Group listed in the byline) and/or Subgroup (eg, Steering Committee) |
| <b>TSC</b>                                                                                                                                                                                    |                   |                              |                  |                                                                           |                                          |                                                         |                                                                                            |
| Elizabeth                                                                                                                                                                                     | Molyneux          |                              |                  | College of medicine, Blantyre Malawi                                      | UK                                       | Chair                                                   | TSC                                                                                        |
| Chris C                                                                                                                                                                                       | Butler            |                              |                  | Nuffield Department of Primary Care Health Sciences, University of Oxford | Oxford, UK                               |                                                         | TSC                                                                                        |
| Alan                                                                                                                                                                                          | Smyth             |                              |                  | Professor of Child Health, University of Nottingham                       | Nottingham                               | Steering committee member                               | TSC                                                                                        |
| Catherine                                                                                                                                                                                     | Prichard          |                              |                  |                                                                           |                                          |                                                         | TSC                                                                                        |
| <b>IDMC</b>                                                                                                                                                                                   |                   |                              |                  |                                                                           |                                          |                                                         |                                                                                            |
| Tim E.A                                                                                                                                                                                       | Peto              |                              |                  |                                                                           |                                          |                                                         | IDMC                                                                                       |
| Simon                                                                                                                                                                                         | Cousens           |                              |                  | London School of Hygiene and Tropical Medicine                            | London                                   |                                                         | IDMC                                                                                       |
| Stuart                                                                                                                                                                                        | Logan             |                              |                  | University of Exeter Medical School                                       | Exeter, Devon                            |                                                         | IDMC                                                                                       |
| <b>ERC</b>                                                                                                                                                                                    |                   |                              |                  |                                                                           |                                          |                                                         |                                                                                            |
| Alasdair                                                                                                                                                                                      | Bamford           |                              |                  | Great Ormond Street Hospital for Children NHS Foundation Trust            | London                                   | ERC member                                              | ERC                                                                                        |
| Anna                                                                                                                                                                                          | Turkova           |                              |                  | MRC CTU at UCL; Great Ormond Street Hospital                              | London, UK                               | ERC member                                              | ERC                                                                                        |
| Anna L                                                                                                                                                                                        | Goodman           |                              |                  |                                                                           |                                          |                                                         | ERC                                                                                        |
| Felicity                                                                                                                                                                                      | Fitzgerald        |                              |                  | UCL Great Ormond Street Institute of Child Health                         | London, UK                               | ERC                                                     | ERC                                                                                        |
| <b>TMG</b>                                                                                                                                                                                    |                   |                              |                  |                                                                           |                                          |                                                         |                                                                                            |
| Paul S                                                                                                                                                                                        | Little            |                              |                  |                                                                           |                                          |                                                         | TMG                                                                                        |

## Supplemental Online Content: Nonauthor Collaborators

\*Indicates required information. Only first name, last name, and suffix will appear in PubMed.

| *First Name and Middle Initial(s) | *Last Name | *Suffix (eg, Jr, III) | Academic Degrees    | Institution                                          | Location (city, state/province, country) | Role or Contribution, eg, chair, principal investigator | Group (if more than 1 Group listed in the byline) and/or Subgroup (eg, Steering Committee) |
|-----------------------------------|------------|-----------------------|---------------------|------------------------------------------------------|------------------------------------------|---------------------------------------------------------|--------------------------------------------------------------------------------------------|
| Julie                             | Robotham   |                       |                     |                                                      |                                          |                                                         | TMG                                                                                        |
| Mandy                             | Wan        |                       |                     |                                                      |                                          |                                                         | TMG                                                                                        |
| Nigel                             | Klein      |                       |                     |                                                      |                                          |                                                         | TMG                                                                                        |
| Louise                            | Rogers     |                       |                     |                                                      |                                          |                                                         | TMG                                                                                        |
| Elia                              | Vitale     |                       |                     |                                                      |                                          |                                                         | TMG                                                                                        |
|                                   |            |                       |                     |                                                      |                                          |                                                         |                                                                                            |
|                                   |            |                       |                     |                                                      |                                          |                                                         |                                                                                            |
|                                   |            |                       |                     |                                                      |                                          |                                                         |                                                                                            |
| <b>INVESTIGATORS</b>              |            |                       |                     |                                                      |                                          |                                                         |                                                                                            |
| Matthew                           | Rotheram   |                       |                     |                                                      | Liverpool, Merseyside, UK                | Co-PI                                                   | PERUKI                                                                                     |
| Rachel                            | Wright     |                       | BSc (Hons)          | Alder Hey Children's Hospital NHS Trust              | Liverpool, Merseyside, UK                | Research Nurse                                          |                                                                                            |
| Elizabeth                         | Lee        |                       | BSc Dip HE RN Child | Alder Hey Children's Hospital NHS Trust              | Liverpool, Merseyside, UK                | Research Nurse                                          |                                                                                            |
| Udeme                             | Ohia       |                       | MPharm              | Alder Hey Children's Hospital NHS Trust              | Liverpool, Merseyside, UK                | Trials Pharmacist                                       |                                                                                            |
| Stuart                            | Hartshorn  |                       |                     | Birmingham Women's and Children's Hospital NHS Trust | Birmingham, U.K                          | Principal investigator                                  | PERUKI                                                                                     |
| Deepthi                           | Jyothish   |                       | MBBS                | Birmingham Women's and Children's Hospital NHS Trust | Birmingham, U.K                          | Co-Principal Investigator                               | GAPRUKI                                                                                    |
| Juliet                            | Hopkins    |                       |                     | Birmingham Women's and Children's Hospital NHS Trust | Birmingham, U.K                          | Nurse                                                   |                                                                                            |
| Louise                            | Rogers     |                       |                     | Birmingham Women's and Children's Hospital NHS Trust | Birmingham, U.K                          | Nurse                                                   |                                                                                            |
| James G                           | Ross       |                       |                     | Chelsea & Westminster NHS Foundation Trust           |                                          | Principal investigator                                  | PERUKI                                                                                     |
| Poonam                            | Patel      |                       |                     |                                                      |                                          | Co-Principal Investigator                               | PERUKI                                                                                     |
| Hannah                            | Fletcher   |                       |                     |                                                      |                                          | Nurse                                                   |                                                                                            |
| Kribashnie                        | Nundlall   |                       |                     |                                                      |                                          | Nurse                                                   |                                                                                            |

## Supplemental Online Content: Nonauthor Collaborators

\*Indicates required information. Only first name, last name, and suffix will appear in PubMed.

| *First Name and Middle Initial(s) | *Last Name       | *Suffix (eg, Jr, III) | Academic Degrees    | Institution                                                  | Location (city, state/province, country) | Role or Contribution, eg, chair, principal investigator | Group (if more than 1 Group listed in the byline) and/or Subgroup (eg, Steering Committee) |
|-----------------------------------|------------------|-----------------------|---------------------|--------------------------------------------------------------|------------------------------------------|---------------------------------------------------------|--------------------------------------------------------------------------------------------|
| Jamie                             | Carungcong       |                       |                     |                                                              |                                          | Nurse                                                   |                                                                                            |
| Rhian                             | Bull             |                       |                     |                                                              |                                          | Nurse                                                   |                                                                                            |
| Nabila                            | Burney           |                       |                     |                                                              |                                          | Nurse                                                   |                                                                                            |
| Patricia                          | Correia Da Costa |                       |                     |                                                              |                                          | Nurse                                                   |                                                                                            |
| Stefania                          | Vergnano         |                       |                     |                                                              |                                          | Co-PI                                                   | GAPRUKI                                                                                    |
| Beth                              | Walton           |                       |                     |                                                              |                                          | Nurse                                                   |                                                                                            |
| Alice                             | Smith            |                       |                     |                                                              |                                          | Nurse                                                   |                                                                                            |
| Michelle                          | Ross             |                       |                     |                                                              |                                          | Nurse                                                   |                                                                                            |
| Lucie                             | Aplin            |                       |                     |                                                              |                                          | Nurse                                                   |                                                                                            |
| Sarah                             | Sheedy           |                       |                     |                                                              |                                          | Nurse                                                   |                                                                                            |
| Gurnie                            | Kaur             |                       |                     |                                                              |                                          | Nurse                                                   |                                                                                            |
| Jeff                              | Morgan           |                       |                     |                                                              |                                          | Principal investigator                                  | PERUKI                                                                                     |
| Jennifer                          | Muller           |                       |                     |                                                              |                                          | Nurse                                                   |                                                                                            |
| Gail                              | Marshall         |                       |                     |                                                              |                                          | Nurse                                                   |                                                                                            |
| Godfrey                           | Nyamugunduru     |                       |                     | County Durham and Darlington                                 |                                          | PI                                                      | GAPRUKI                                                                                    |
| John C                            | Furness          |                       | MBBS                | County Durham and Darlington FT @ time of study now Leeds TH | Leed W Yorks UK                          | Former PI                                               | PERUKI                                                                                     |
| Dawn                              | Eggington        |                       |                     | County Durham and Darlington                                 |                                          | Nurse                                                   |                                                                                            |
| Susannah J                        | Holt             |                       | BMedSci<br>BMBS     | Countess of Chester                                          | Chester                                  | PI                                                      | GAPRUKI                                                                                    |
| John                              | Gibbs            |                       |                     | Countess of Chester                                          | Chester                                  | Co-PI                                                   | GAPRUKI                                                                                    |
| Caroline                          | Burchett         |                       |                     | Countess of Chester                                          | Chester                                  | Nurse                                                   |                                                                                            |
| Caroline                          | Lonsdale         |                       |                     | Countess of Chester                                          | Chester                                  | Nurse                                                   |                                                                                            |
| Sarah                             | De-Beger         |                       |                     | Countess of Chester                                          | Chester                                  | Nurse                                                   |                                                                                            |
| Ronny                             | Cheung           |                       | MA<br>BMBS<br>MRCPC | Evelina London Children's Hospital                           | London                                   | Co-PI                                                   | GAPRUKI                                                                                    |
| Alyce B                           | Sheedy           |                       |                     | Evelina London Children's Hospital                           |                                          | Nurse                                                   |                                                                                            |

## Supplemental Online Content: Nonauthor Collaborators

\*Indicates required information. Only first name, last name, and suffix will appear in PubMed.

| *First Name and Middle Initial(s) | *Last Name    | *Suffix (eg, Jr, III) | Academic Degrees | Institution                                        | Location (city, state/province, country) | Role or Contribution, eg, chair, principal investigator | Group (if more than 1 Group listed in the byline and/or Subgroup (eg, Steering Committee)) |
|-----------------------------------|---------------|-----------------------|------------------|----------------------------------------------------|------------------------------------------|---------------------------------------------------------|--------------------------------------------------------------------------------------------|
| Mohammad                          | Ahmad         |                       |                  | Evelina London Children's Hospital                 |                                          | Nurse                                                   |                                                                                            |
| Zoe                               | Stockwell     |                       |                  | Evelina London Children's Hospital                 |                                          | Nurse                                                   |                                                                                            |
| Sarah                             | Giwa          |                       |                  | Evelina London Children's Hospital                 |                                          | Nurse                                                   |                                                                                            |
| Arshid                            | Murad         |                       |                  |                                                    |                                          | PI                                                      | GAPRUKI                                                                                    |
| Katherine                         | Jerman        |                       |                  |                                                    |                                          | Co-PI                                                   | PERUKI                                                                                     |
| Joanna                            | Green         |                       |                  |                                                    |                                          | Nurse                                                   |                                                                                            |
| Chris                             | Bird          |                       |                  |                                                    |                                          | PI                                                      | PERUKI                                                                                     |
| Tanya K Z                         | Baron         |                       |                  |                                                    |                                          | Co-PI                                                   | PERUKI                                                                                     |
| Shelley                           | Segal         |                       |                  |                                                    |                                          | Nurse                                                   |                                                                                            |
| Sally                             | Beer          |                       |                  |                                                    |                                          | Nurse                                                   |                                                                                            |
| Maria Jose                        | Garcia Garcia |                       |                  |                                                    |                                          | Nurse                                                   |                                                                                            |
| Dom                               | Georgiou      |                       |                  |                                                    |                                          | Nurse                                                   |                                                                                            |
| Kirsten                           | Beadon        |                       |                  |                                                    |                                          | Nurse                                                   |                                                                                            |
| Jose                              | Martinez      |                       |                  |                                                    |                                          |                                                         |                                                                                            |
| Fleur                             | Cantle        |                       |                  |                                                    |                                          | PI                                                      | PERUKI                                                                                     |
| Hannah                            | Eastman       |                       |                  |                                                    |                                          |                                                         |                                                                                            |
| Paul                              | Riozzi        |                       |                  |                                                    |                                          |                                                         |                                                                                            |
| Hannah                            | Cotton        |                       |                  |                                                    |                                          |                                                         |                                                                                            |
| Niall                             | Mullen        |                       | MB BCh<br>BaO    | South Tyneside and Sunderland NHS Foundation Trust | Sunderland, United Kingdom               | Principal Investigator                                  | PERUKI                                                                                     |
| Rhona                             | McCrone       |                       |                  |                                                    |                                          | Co-PI                                                   | GAPRUKI                                                                                    |
| Paul                              | Corrigan      |                       |                  |                                                    |                                          |                                                         |                                                                                            |
| Gemma                             | Salt          |                       |                  |                                                    |                                          |                                                         |                                                                                            |
| Louise                            | Fairlie       |                       |                  |                                                    |                                          |                                                         |                                                                                            |
| Andrew                            | Smith         |                       |                  |                                                    |                                          |                                                         |                                                                                            |
| Lizzie                            | Starkey       |                       |                  |                                                    |                                          | Co-PI                                                   | GAPRUKI                                                                                    |
| Mel                               | Hayman        |                       |                  |                                                    |                                          |                                                         |                                                                                            |
| Sean                              | O'Riordan     |                       |                  |                                                    |                                          | PI                                                      | GAPRUKI                                                                                    |
| Alice                             | Downes        |                       |                  |                                                    |                                          |                                                         |                                                                                            |

## Supplemental Online Content: Nonauthor Collaborators

\*Indicates required information. Only first name, last name, and suffix will appear in PubMed.

| *First Name and Middle Initial(s) | *Last Name | *Suffix (eg, Jr, III) | Academic Degrees | Institution                                                                                                                                                                                                     | Location (city, state/province, country) | Role or Contribution, eg, chair, principal investigator | Group (if more than 1 Group listed in the byline and/or Subgroup (eg, Steering Committee)) |
|-----------------------------------|------------|-----------------------|------------------|-----------------------------------------------------------------------------------------------------------------------------------------------------------------------------------------------------------------|------------------------------------------|---------------------------------------------------------|--------------------------------------------------------------------------------------------|
| Majorie                           | Allen      |                       |                  |                                                                                                                                                                                                                 |                                          |                                                         |                                                                                            |
| Louise                            | Turner     |                       |                  |                                                                                                                                                                                                                 |                                          |                                                         |                                                                                            |
| Donna                             | Ellis      |                       |                  |                                                                                                                                                                                                                 |                                          |                                                         |                                                                                            |
| Srini                             | Bandi      |                       |                  |                                                                                                                                                                                                                 |                                          | Co-PI                                                   | GAPRUKI                                                                                    |
| Rekha                             | Patel      |                       |                  |                                                                                                                                                                                                                 |                                          |                                                         |                                                                                            |
| Chris                             | Gough      |                       |                  |                                                                                                                                                                                                                 |                                          | PI                                                      | PERUKI                                                                                     |
| Megan                             | McAulay    |                       |                  |                                                                                                                                                                                                                 |                                          | Nurse                                                   |                                                                                            |
| Louise                            | Conner     |                       |                  |                                                                                                                                                                                                                 |                                          | Nurse                                                   |                                                                                            |
| Sharryn                           | Gardner    |                       |                  |                                                                                                                                                                                                                 |                                          | PI                                                      | PERUKI                                                                                     |
| Zena                              | Haslam     |                       |                  |                                                                                                                                                                                                                 |                                          | Nurse                                                   |                                                                                            |
| Moira                             | Morrison   |                       |                  |                                                                                                                                                                                                                 |                                          | Nurse                                                   |                                                                                            |
| Michael J                         | Barrett    |                       |                  | 1. Children's Health Ireland at Crumlin, Dublin, Ireland<br>2. Women's and Children's Health, School of Medicine, University College Dublin, Ireland<br>3. National Children's Research Centre, Dublin, Ireland |                                          | PI                                                      | PERUKI                                                                                     |
| Madeleine                         | Niermeyer  |                       |                  |                                                                                                                                                                                                                 |                                          | Nurse                                                   |                                                                                            |
| Ellen                             | Barry      |                       |                  |                                                                                                                                                                                                                 |                                          | Nurse                                                   |                                                                                            |
| Emily K                           | Walton     |                       |                  |                                                                                                                                                                                                                 |                                          | PI                                                      | PERUKI                                                                                     |
| Akshat                            | Kapur      |                       |                  |                                                                                                                                                                                                                 |                                          | Co-PI                                                   | GAPRUKI                                                                                    |
| Vivien                            | Richmond   |                       |                  |                                                                                                                                                                                                                 |                                          | Nurse                                                   |                                                                                            |
| Steven J                          | Foster     |                       |                  |                                                                                                                                                                                                                 |                                          | PI                                                      | PERUKI                                                                                     |
| RM                                | Bland      |                       | FRCPCH MD        | (1) Royal Hospital for Children, Glasgow (2) Institute of Health and Wellbeing, University of Glasgow                                                                                                           |                                          | Co-PI                                                   | GAPRUKI                                                                                    |
| Ashleigh                          | Neil       |                       |                  |                                                                                                                                                                                                                 |                                          | Nurse                                                   |                                                                                            |
| Barry                             | Milligan   |                       |                  |                                                                                                                                                                                                                 |                                          | Nurse                                                   |                                                                                            |

## Supplemental Online Content: Nonauthor Collaborators

\*Indicates required information. Only first name, last name, and suffix will appear in PubMed.

| *First Name and Middle Initial(s) | *Last Name        | *Suffix (eg, Jr, III) | Academic Degrees             | Institution                                          | Location (city, state/province, country) | Role or Contribution, eg, chair, principal investigator | Group (if more than 1 Group listed in the byline and/or Subgroup (eg, Steering Committee)) |
|-----------------------------------|-------------------|-----------------------|------------------------------|------------------------------------------------------|------------------------------------------|---------------------------------------------------------|--------------------------------------------------------------------------------------------|
| Helen                             | Bannister         |                       |                              |                                                      |                                          | Nurse                                                   |                                                                                            |
| Ben                               | Bloom             |                       |                              |                                                      |                                          | PI                                                      | PERUKI                                                                                     |
| Ami                               | Parikh            |                       |                              |                                                      |                                          | Co-PI                                                   | PERUKI                                                                                     |
| Imogen                            | Skene             |                       |                              |                                                      |                                          | Nurse                                                   |                                                                                            |
| Helen                             | Power             |                       |                              |                                                      |                                          | Nurse                                                   |                                                                                            |
| Olivia                            | Boulton           |                       |                              |                                                      |                                          | Nurse                                                   |                                                                                            |
| Raine                             | Astin-Chamberlain |                       |                              |                                                      |                                          | Nurse                                                   |                                                                                            |
| David                             | Smith             |                       |                              |                                                      |                                          |                                                         |                                                                                            |
| Jonathon                          | Walters           |                       |                              |                                                      |                                          |                                                         |                                                                                            |
| Daniel                            | Martin            |                       |                              |                                                      |                                          |                                                         |                                                                                            |
| Lyrics                            | Noba              |                       |                              |                                                      |                                          |                                                         |                                                                                            |
| Katherine                         | Potier            |                       |                              |                                                      |                                          |                                                         |                                                                                            |
| Fiona                             | Borland           |                       |                              |                                                      |                                          |                                                         |                                                                                            |
| Jill                              | Wilson            |                       |                              |                                                      |                                          |                                                         |                                                                                            |
| Zainab                            | Suleman           |                       |                              |                                                      |                                          |                                                         |                                                                                            |
| Judith                            | Gilchrist         |                       |                              |                                                      |                                          | PI                                                      | PERUKI                                                                                     |
| Noreen                            | West              |                       |                              |                                                      |                                          | Co-PI                                                   | GAPRUKI                                                                                    |
| Jayne                             | Evans             |                       |                              |                                                      |                                          | Nurse                                                   |                                                                                            |
| Juliet                            | Morecombe         |                       |                              |                                                      |                                          | Nurse                                                   |                                                                                            |
| Paul T                            | Heath             |                       | MB BS<br>FRCPCH              | St Georges, University of London                     | London                                   | PI                                                      | GAPRUKI                                                                                    |
| Yasser                            | Iqbal             |                       |                              |                                                      |                                          | Co-PI                                                   | PERUKI                                                                                     |
| Malte                             | Kohns Vasconcelos |                       |                              |                                                      |                                          |                                                         |                                                                                            |
| Elena                             | Stefanova         |                       |                              |                                                      |                                          | Nurse                                                   |                                                                                            |
| Claire                            | Womack            |                       |                              |                                                      |                                          | Nurse                                                   |                                                                                            |
| Ian K                             | Maconochie        |                       | FRCPCH<br>FRCEM<br>FRCPI PhD | Imperial College NHS Healthcare Trust, London W2 1NY | London, UK                               | PI                                                      | PERUKI                                                                                     |
| Suzanne                           | Laing             |                       |                              |                                                      |                                          | Nurse                                                   |                                                                                            |

## Supplemental Online Content: Nonauthor Collaborators

\*Indicates required information. Only first name, last name, and suffix will appear in PubMed.

| *First Name and Middle Initial(s) | *Last Name | *Suffix (eg, Jr, III) | Academic Degrees            | Institution                  | Location (city, state/province, country) | Role or Contribution, eg, chair, principal investigator | Group (if more than 1 Group listed in the byline) and/or Subgroup (eg, Steering Committee) |
|-----------------------------------|------------|-----------------------|-----------------------------|------------------------------|------------------------------------------|---------------------------------------------------------|--------------------------------------------------------------------------------------------|
| Rikke                             | Jorgensen  |                       |                             |                              |                                          | Nurse                                                   |                                                                                            |
| Maggie                            | Nyirenda   |                       | MBBS, MMED pch, MSc, FRCPCH | University Hospital Lewisham | London                                   | Site Principal investigator                             | PERUKI                                                                                     |
| Sophie                            | Keers      |                       |                             |                              |                                          | Co-PI                                                   | PERUKI                                                                                     |
| Samia                             | Pilgrim    |                       |                             |                              |                                          | Nurse                                                   |                                                                                            |
| Emma                              | Gardiner   |                       |                             |                              |                                          | Nurse                                                   |                                                                                            |
| Katrina                           | Cathie     |                       |                             |                              |                                          | PI                                                      | GAPRUKI                                                                                    |
| Jane                              | Bayreuther |                       |                             |                              |                                          | Co-PI                                                   | PERUKI                                                                                     |
| Ruth                              | Ensom      |                       |                             |                              |                                          | Nurse                                                   |                                                                                            |
| Emily K                           | Cornish    |                       |                             |                              |                                          | Nurse                                                   |                                                                                            |
| Elizabeth-Jayne L                 | Herrieven  |                       |                             |                              |                                          | PI                                                      | PERUKI                                                                                     |
| William                           | Townend    |                       |                             |                              |                                          | Co-PI                                                   | PERUKI                                                                                     |
| Leanne                            | Sherris    |                       |                             |                              |                                          | Nurse                                                   |                                                                                            |
| Paul                              | Williams   |                       |                             |                              |                                          | Nurse                                                   |                                                                                            |
