# Supplementary material
Source: PubMed Central journal article supplement (PMC8564579)
Supplement: jama-e2117843-s005.pdf [file jama-e2117843-s005.pdf]

## Data Sharing Statement

### Data

**Data available:** Yes

**Data types:** Other (please specify)

**Additional Information:** Data will be shared according to the Medical Research Council Clinical Trials Unit's controlled access approach, based on the following principles: No data should be released that would compromise an ongoing trial or study.

**How to access data:** [jbielick@sgul.ac.uk](mailto:jbielick@sgul.ac.uk)

**When available:** With publication

### Supporting Documents

**Document types:** Other (please specify)

**Additional Information:** Standard Operating Procedure for data sharing from the Medical Research Council Clinical Trials Unit

**How to access documents:** [jbielick@sgul.ac.uk](mailto:jbielick@sgul.ac.uk)

**When available:** With publication

### Additional Information

**Who can access the data:** Please see statement above.

**Types of analyses:** Please see statement above.

**Mechanisms of data availability:** Please see statement above.

**Any additional restrictions:** Please see statement above.
